# Supplementary material for: Branch-and-Bound for Bi-objective Integer Programming
Source: Atypon-hosted journal article supplement (doi:10.1287/ijoc.2018.0856), 2019-07-08
Supplement: ijoc.2018.0856.sm1.pdf [file ijoc.2018.0856.sm1.pdf]

Authors are encouraged to submit new papers to INFORMS journals by means of a style file template, which includes the journal title. However, use of a template does not certify that the paper has been accepted for publication in the named journal. INFORMS journal templates are for the exclusive purpose of submitting to an INFORMS journal and should not be used to distribute the papers in print or online or to submit the papers to another publication.

## Online Supplement to “Branch-and-bound for bi-objective integer programming”

Sophie N. Parragh and Fabien Tricoire

Institute of Production and Logistics Management, Johannes Kepler University Linz,  
Altenberger Straße 69, 4040 Linz, Austria  
{sophie.parragh,fabien.tricoire}@jku.at, <http://www.jku.at/plm>

In this online supplement, we present algorithms and model formulations that are used in order to produce experimental results in the article.

*Key words:* branch-and-bound, integer programming, bi-objective optimization, branch-and-price, orienteering

*History:*

---

### 1. Algorithms for criterion space search methods

Algorithms 4 and 5 outline the  $\epsilon$ -constraint method and the balanced box method, respectively. The set  $P$  denotes the set of Pareto optimal solutions. Function *solveMIP* can either be a call to Gurobi or CPLEX or to a tailor-made branch-and-bound algorithm. The value of  $\epsilon$  is supposed to be valid for the problem at hand; for instance with pure integer problems with integer coefficients for the objective function,  $\epsilon = 1$  is such a valid value.

---

**Algorithm 4**  $\epsilon$ -constraint algorithm

---

```

 $P \leftarrow \emptyset$ 
 $\epsilon$ -constraint  $\leftarrow f_2 \leq \infty$ 
while MIP is feasible do
   $x \leftarrow \text{solveMIP}(\text{lexmin}(f_1, f_2), \epsilon\text{-constraint})$ 
   $P \leftarrow P \cup x$ 
   $\epsilon$ -constraint  $\leftarrow f_2 \leq f_2(x) - \epsilon$ 
end while
return  $P$ 

```

---

**2. UBOFLP: Model formulation**

In the UBOFLP, we are given a set  $V$  of potential facilities and a set  $N$  of locations. Furthermore, we denote by  $N_i$  the set of locations that can be covered by facility  $i$  because they are within a certain radius. Each facility has opening costs  $F_i$  and each location has a weight or demand  $W_j$ . The considered objectives simultaneously minimize the opening costs of facilities and maximize the total covered demand.

Using binary decision variables  $y_i \in \{0, 1\}$  equal to 1 if facility  $i$  is opened and 0 otherwise, and  $x_{ij} \in \{0, 1\}$  equal to 1 if location  $j$  is assigned to facility  $i$ , we formally define the UBOFLP as follows:

$$\min \sum_{i \in V} F_i y_i \quad (1)$$

$$\max \sum_{i \in V} \sum_{j \in N_i} W_j x_{ij} \quad (2)$$

subject to:

$$x_{ij} \leq y_i \quad \forall i \in V, j \in N, \quad (3)$$

$$\sum_{i \in V} x_{ij} = 1 \quad \forall j \in N, \quad (4)$$

$$y_i \in \{0, 1\} \quad \forall i \in V, \quad (5)$$

$$x_{ij} \in \{0, 1\} \quad \forall i \in V, j \in N. \quad (6)$$

**3. SSUFLP: Model formulation**

In the SSUFLP, we are given a set  $V$  of potential facilities and a set  $N$  of locations that have to be assigned to one of the facilities each. Each facility has opening costs  $F_i$  and it costs

---

**Algorithm 5** Balanced box method

---

```

 $P \leftarrow \emptyset, \text{Rectangles} \leftarrow \emptyset$ 
 $x^T \leftarrow \text{solveMIP}(\text{lexmin}(f_1, f_2))$ 
 $x^B \leftarrow \text{solveMIP}(\text{lexmin}(f_2, f_1))$ 
 $P \leftarrow P \cup \{x^T, x^B\}$ 
 $\text{Rectangles} \leftarrow \text{Rectangles} \cup \{\text{rectangle } z^T = (f_1(x^T), f_2(x^T)), z^B = (f_1(x^B), f_2(x^B))\}$ 
while  $\text{Rectangles} \neq \emptyset$  do
     $\text{Rectangles.pop}(\text{rectangle}(z^1, z^2))$ 
     $\text{rectangle}^B \leftarrow \text{rectangle}((z_1^1, (z_2^1 + z_2^2)/2), z^2)$ 
     $\bar{x}^1 \leftarrow \text{solveMIP}(\text{lexmin}(f_1, f_2), \text{rectangle}^B \text{ constraints})$ 
     $\bar{z}^1 = (f_1(\bar{x}^1), f_2(\bar{x}^1))$ 
    if  $\bar{z}^1 \neq z^2$  then
         $P \leftarrow P \cup \{\bar{x}^1\}$ 
         $\text{Rectangles} \leftarrow \text{Rectangles} \cup \text{rectangle}(\bar{z}^1, z^2)$ 
    end if
     $\text{rectangle}^T \leftarrow \text{rectangle}(z^1, (\bar{z}_1^1 - \epsilon, (z_2^1 + z_2^2)/2))$ 
     $\bar{x}^2 \leftarrow \text{solveMIP}(\text{lexmin}(f_2, f_1), \text{rectangle}^T \text{ constraints})$ 
     $\bar{z}^2 = (f_1(\bar{x}^2), f_2(\bar{x}^2))$ 
    if  $\bar{z}^2 \neq z^1$  then
         $P \leftarrow P \cup \{\bar{x}^2\}$ 
         $\text{Rectangles} \leftarrow \text{Rectangles} \cup \text{rectangle}(z^1, \bar{z}^2)$ 
    end if
end while
return  $P$ 

```

---

$c_{ij}$  to assign location  $j$  to facility  $i$ . The considered objectives simultaneously minimize the total opening costs of facilities and the total assignment costs.

Using binary decision variables  $y_i \in \{0, 1\}$  equal to 1 if facility  $i$  is opened and 0 otherwise, and  $x_{ij} \in \{0, 1\}$  equal to 1 if location  $j$  is assigned to facility  $i$ , we formally define the SSUFLP as follows:

$$\min \sum_{i \in V} F_i y_i \quad (7)$$

$$\min \sum_{i \in V} \sum_{j \in N} c_{ij} x_{ij} \quad (8)$$

subject to:

$$x_{ij} \leq y_i \quad \forall i \in V, j \in N, \quad (9)$$

$$\sum_{i \in V} x_{ij} = 1 \quad \forall j \in N, \quad (10)$$

$$y_i \in \{0, 1\} \quad \forall i \in V, \quad (11)$$

$$x_{ij} \in \{0, 1\} \quad \forall i \in V, j \in N. \quad (12)$$

#### 4. BITOPTW: Model formulation

The BITOPTW is defined on a directed graph  $G = (V, A)$ , where  $A$  is the set of arcs and  $V$  the set of vertices, representing the starting location (vertex 0), the ending location (vertex  $n + 1$ ) and  $n$  control points. Each control point  $i$  is associated with a score  $S_i$ , a service time  $d_i$  and a time window  $[e_i, l_i]$ . Each route  $k \in K$ , with  $|K| = m$ , has to start at location 0 and end at location  $n + 1$  and each arc  $(i, j)$  is associated with travel cost  $c_{ij}$  and travel time  $t_{ij}$ . The aim is to maximize the total collected score and to simultaneously minimize the total travel cost. Using binary decision variables  $z_i \in \{0, 1\}$  equal to 1 if location  $i$  is visited and 0 otherwise, and  $y_{ijk} \in \{0, 1\}$  equal to 1 if arc  $(i, j)$  is traversed by route  $k$  and 0 otherwise, and continuous variables  $B_{ik}$ , denoting the beginning of service at  $i$  by route  $k$ , we formally define the BITOPTW as follows:

$$\min \sum_{k \in K} \sum_{(i,j) \in A} c_{ij} y_{ijk} \quad (13)$$

$$\max \sum_{i \in V \setminus \{0, n+1\}} S_i z_i \quad (14)$$

subject to:

$$\sum_{j \in V \setminus \{0\}} y_{0jk} = 1 \quad \forall k \in K \quad (15)$$

$$\sum_{i \in V \setminus \{n+1\}} y_{i, n+1, k} = 1 \quad \forall k \in K \quad (16)$$

$$\sum_{k \in K} \sum_{j \in V \setminus \{n+1\}} y_{jik} = z_i \quad \forall i \in V \setminus \{0, n+1\} \quad (17)$$

$$\sum_{j \in V \setminus \{n+1\}} y_{jik} - \sum_{j \in V \setminus \{0\}} y_{ijk} = 0 \quad \forall k \in K, i \in V \setminus \{0, n+1\} \quad (18)$$

$$(B_{ik} + d_i + t_{ij})y_{ijk} \leq B_{jk} \quad \forall k \in K, (i, j) \in A \quad (19)$$

$$e_i \leq B_{ik} \leq l_i \quad \forall k \in K, i \in V \quad (20)$$

$$y_{ijk} \in \{0, 1\} \quad \forall k \in K, (i, j) \in A \quad (21)$$

$$z_i \in \{0, 1\} \quad \forall i \in V \setminus \{0, n + 1\} \quad (22)$$

Objective function (13) minimizes the total routing costs while objective function (14) maximizes the total collected profit. Constraints (15) and (16) make sure that each route starts at the defined starting point and ends at the correct ending point. Constraints (17) link the binary decision variables and (18) ensure connectivity for visited nodes. Constraints (19) set the time variables and (20) make sure that time windows are respected. We note that constraints (19) are not linear but they can easily be linearized using big  $M$  terms.
